# Supplementary material
Source: Springer Nature journal article supplement (https://www.springermedizin.de/resource/supplementary/12885_2012_3330_MOESM6_ESM.pdf/9463532)

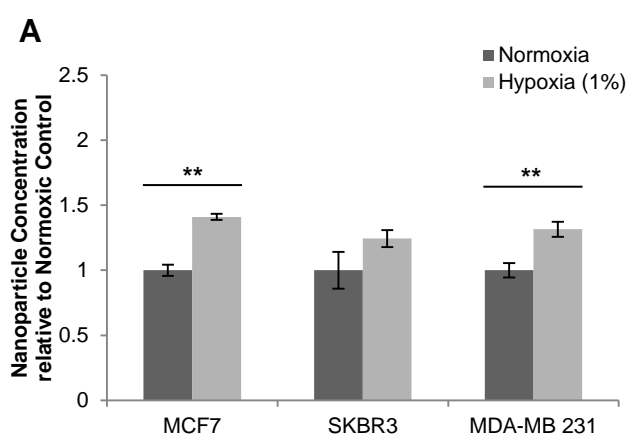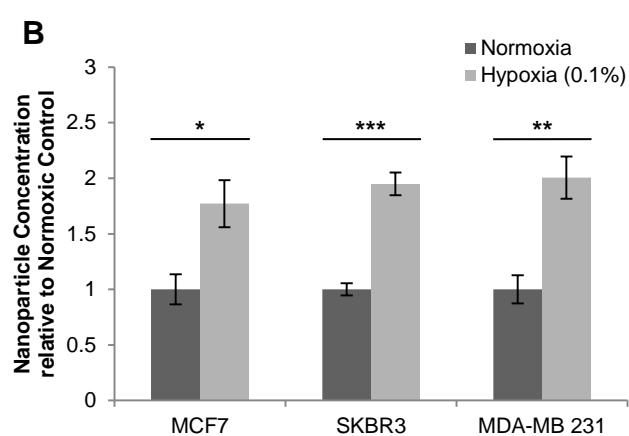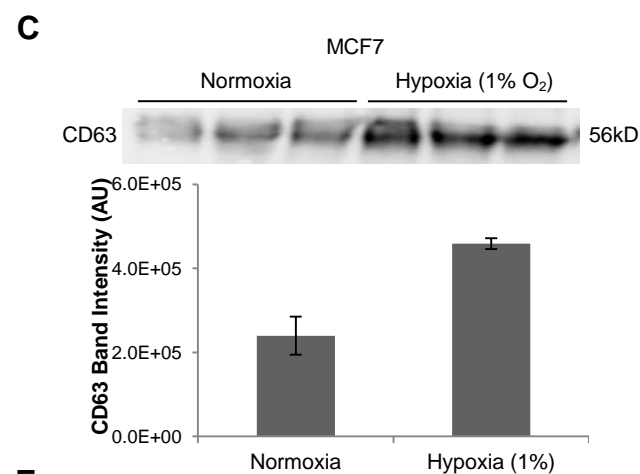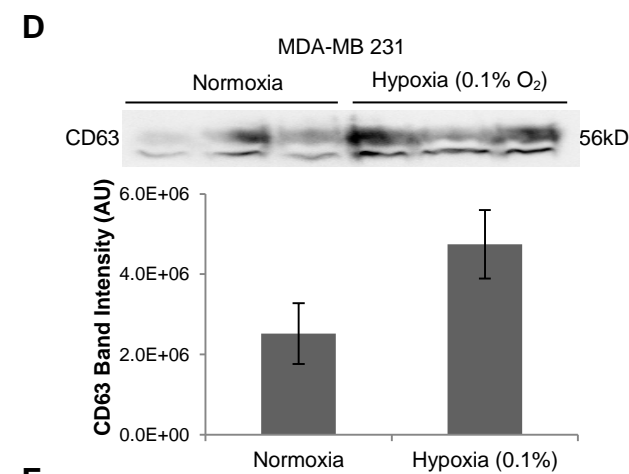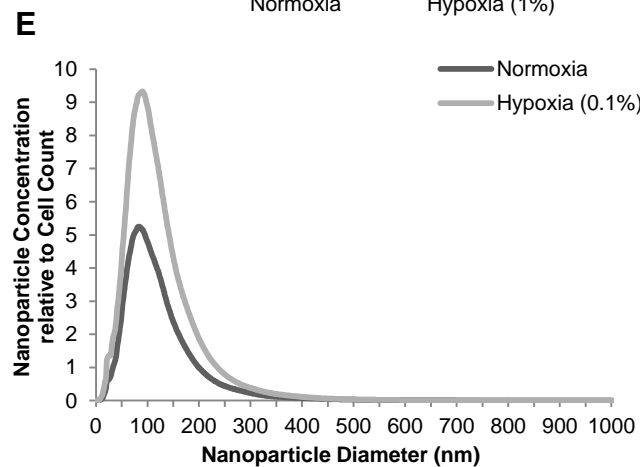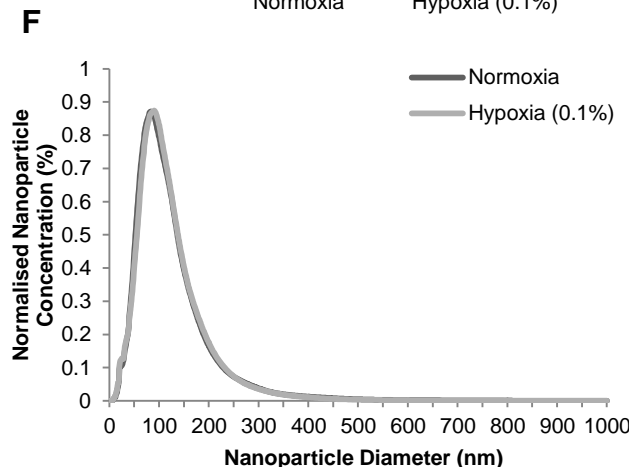

Supplement: MOESM6 [file 9463532]
